# Supplementary material for: Regionale verschillen in gezondheid nader verklaard
Source: Springer Nature journal article supplement (doi:10.1007/s12508-021-00323-w), 2022-03-31
Supplement: MOESM1 [file 20295312]

**Appendix**

| Tabel A1. Categorieën, coderingen, en bronnen van uitkomsten en onafhankelijke variabelen. | | | | | | | |
| --- | --- | --- | --- | --- | --- | --- | --- |
| Variabele | **Categorie** | **Code** | **Bron** | **Variabele** | **Categorie** | **Code** | **Bron** |
| Geslacht§ | Man | 0 | CBS | **Beweging*** | Onvoldoende | 1 | Gezondheidsmonitor |
|  | Vrouw | 1 | CBS | Voldoende | 0 | Gezondheidsmonitor |
| Migratie achtergrond§ | Autochtoon | 0 | CBS | **BMI*** | Ondergewicht (<18,5) | 1 | Gezondheidsmonitor |
| Westerse migratie achtegrond | 1 | CBS | Normaal (18,5-25) | 0 | Gezondheidsmonitor |
|  | Niet-westerse migratie achtegrond | 2 | CBS |  | Overgewicht (25-30) | 2 | Gezondheidsmonitor |
| Burgerlijke  staat* | Gehuwd/samenwonend | 0 | Gezondheidsmonitor |  | Obesitas (30>) | 3 | Gezondheidsmonitor |
| Nooit gehuwd | 1 | Gezondheidsmonitor | **Alcohol consumptie*** | Nooit | 0 | Gezondheidsmonitor |
| Verweduwd | 2 | Gezondheidsmonitor | Normaal | 1 | Gezondheidsmonitor |
| Gescheiden | 3 | Gezondheidsmonitor | Overmatig | 2 | Gezondheidsmonitor |
| Hoogst behaalde opleidingsniveau* | Basisschool | 3 | Gezondheidsmonitor | **Roken*** | Nooit gerookt | 0 | Gezondheidsmonitor |
| Lbo/mavo | 2 | Gezondheidsmonitor |  | Ex-roker | 1 | Gezondheidsmonitor |
|  | Mbo/havo/vwo | 1 | Gezondheidsmonitor |  | Roker | 2 | Gezondheidsmonitor |
|  | Hbo/wo | 0 | Gezondheidsmonitor | **Eenzaamheid*** | Continue score 0-11¹ | N/a | Gezondheidsmonitor |
| Kwartiel gestandardiseerd huishoudinkomen§ | 0-25% | 3 | CBS | **Zelfregie*** | Continue score 7-35¹ | n/a | Gezondheidsmonitor |
| 26-50% | 2 | CBS | **Chronische ziekte*** | Geen | 0 | Gezondheidsmonitor |
| 51-75% | 1 | CBS | Eén of meer | 1 | Gezondheidsmonitor |
|  | 76-100% | 0 | CBS | **Zelf-ervaren gezondheid*** | Zeer (goed) | 0 | Gezondheidsmonitor |
| Moeite met rondkomen* | Ja, grote moeite | 3 | Gezondheidsmonitor | Gaat wel, (zeer) slecht | 1 | Gezondheidsmonitor |
| Ja, enige moeite | 2 | Gezondheidsmonitor | **Risico op een angststoornis of depressie*** | Geen of laag (scores 10-29)² | 0 | Gezondheidsmonitor |
|  | Nee, geen moeite, maar wel opletten op uitgaven | 1 | Gezondheidsmonitor | Hoog (scores 30-50)² | 1 | Gezondheidsmonitor |
|  | Nee, geen moeite | 0 | Gezondheidsmonitor |  |  |  |  |

BMI: body mass index. §Register data *Zelf-gerapporteerde data (gezondheidsmonitor). ¹ De variabelen eenzaamheid en zelfregie zijn continue variabelen. De 11 stellingen voor eenzaamheid (zie tabel A2) worden beantwoord “ja”, “min of meer” of “nee” en resulteren in een score tussen de 0 en 11. Respondenten met een score van 0,1 of 2 worden beschouwd als niet eenzaam, respondenten met een score van 3 tot en met 8 zijn matig eenzaam, respondenten met een score van 9 of 10 zijn ernstig eenzaam en respondenten met een score van 11 zijn zeer ernstig eenzaam. De 7 stellingen voor zelfregie worden beantwoord op een 5-punts Likert schaal (helemaal mee eens [laagste score 1], mee eens, niet mee eens/oneens, niet mee eens of helemaal niet mee eens [hoogste score 5]). Dit leidt tot een score tussen de 7 en 35, met een score van 19 of lager wordt onvoldoende zelfregie ervaren. ² De variabele risico op een angststoornis of een depressie is afgeleid van de Kessler-10 vragenlijst. De 10 vragen (zie tabel A2) worden beantwoord middels de antwoordcategorieën op een 5-punts Likert schaal (altijd, meestal, soms, af en toe, en nooit). De K10 score varieert tussen 10 (geen risico) en maximaal 50 (hoog risico).

| Tabel A2. De stellingen/vragen voor de variabelen eenzaamheid, zelfregie, en risico op een angststoornis of depressie. | |
| --- | --- |
| Eenzaamheid (De Jong-Gierveld 1985)¹ | 1. Er is altijd wel iemand in mijn omgeving bij wie ik met mijn dagelijkse probleempjes terecht kan. |
| 2. Ik mis een echt goede vriend of vriendin. |
| 3. Ik ervaar een leegte om mij heen. |
|  | 4. Er zijn genoeg mensen op wie ik in geval van narigheid kan terugvallen. |
|  | 5. Ik mis gezelligheid om mij heen. |
|  | 6. Ik vind mijn kring van kennissen te beperkt. |
|  | 7. Ik heb veel mensen op wie ik volledig kan vertrouwen. |
|  | 8. Er zijn voldoende mensen met wie ik me nauw verbonden voel. |
|  | 9. Ik mis mensen om mij heen. |
|  | 10. Vaak voel ik me in de steek gelaten. |
|  | 11. Wanneer ik daar behoefte aan heb, kan ik altijd bij mijn vrienden terecht. |
| Zelfregie (Pearlin & Schooler 1978)² | 1. Ik heb weinig controle over de dingen die me overkomen. |
| 2. Sommige van mijn problemen kan ik met geen mogelijkheid oplossen. |
| 3. Er is weinig dat ik kan doen om belangrijke dingen in mijn leven te veranderen. |
|  | 4. Ik voel me vaak hulpeloos bij het omgaan met de problemen van het leven. |
|  | 5. Soms voel ik dat ik een speelbal van het leven ben. |
|  | 6. Wat er in de toekomst met me gebeurt, hangt voor het grootste deel van mezelf af. |
|  | 7. Ik kan ongeveer alles als ik m’n zinnen erop gezet heb. |
| Risico op een angst-stoornis of depressie (Kessler 2002) [K10]³ | 1. Hoe vaak voelde u zich erg vermoeid zonder duidelijke reden? |
| 2. Hoe vaak voelde u zich zenuwachtig? |
| In de afgelopen 4 weken… | 3. Hoe vaak was u zo zenuwachtig dat u niet tot rust kon komen? |
|  | 4. Hoe vaak voelde u zich hopeloos? |
|  | 5. Hoe vaak voelde u zich rusteloos of ongedurig? |
| 6. Hoe vaak voelde u zich zo rusteloos dat u niet meer stil kon zitten? |
|  | 7. Hoe vaak voelde u zich somber of depressief? |
|  | 8. Hoe vaak had u het gevoel dat alles veel moeite kostte? |
|  | 9. Hoe vaak voelde u zich zo somber dat niets hielp om u op te vrolijken? |
|  | 10. Hoe vaak vond u zichzelf afkeurenswaardig, minderwaardig of waardeloos? |

**¹** De 11 stellingen van De Jong-Gierveld worden beantwoord “ja”, “min of meer” of “nee”. ² De 7 stellingen van Pearlin & Schooler worden beantwoord op een 5-punts Likert schaal (helemaal mee eens, mee eens, niet mee eens/oneens, niet mee eens of helemaal niet mee eens). ³ De K10 vragen worden beantwoord middels een 5-punts Likert schaal (altijd, meestal, soms, af en toe, en nooit).

| **Tabel A3. Missende data (n=457,150)** | | |
| --- | --- | --- |
| **Variabele** | **N** | **(%)** |
| **Regio*** | 0 | (0) |
| **Leeftijd**§ | 0 | (0) |
| **Geslacht**§ | 0 | (0) |
| **Migratie achtergrond**§ | 0 | (0) |
| **Burgerlijke staat*** | 11.192 | (2,4) |
| **Hoogst behaalde opleidingsniveau*** | 31.422 | (6,9) |
| **Kwartiel gestandaardiseerd huishoudinkomen**§ | 737 | (0,2) |
| **Moeite met rondkomen*** | 35.643 | (7,8) |
| **Beweging*** | 33.488 | (7,3) |
| **BMI*** | 21.261 | (4,7) |
| **Alcohol consumptie*** | 36.967 | (8,1) |
| **Roken*** | 32.605 | (7,1) |
| **Chronische ziekte*** | 8.808 | (1,9) |
| **Zelf-ervaren gezondheid*** | 5.730 | (1,3) |
| **Risico op een angststoornis of depressie*** | 20.103 | (4,4) |
| **Eenzaamheid*** | 36.364 | (8,0) |
| **Zelfregie*** | 36.612 | (8,0) |

BMI: body mass index. §Register data *Zelf-gerapporteerde data (gezondheidsmonitor).

| **Tabel A4. Descriptieve gewogen data** | | |
| --- | --- | --- |
| **Variabele** | **Categorie** | **%** | |
| **Geslacht**§ | Man | 50,9 | |
| **Migratie achtergrond**§ | Nederlandse achtergrond | 78,8 | |
|  | Westerse migratie achtergrond | 4,9 | |
| **Burgerlijke Staat*** | Gehuwd/samenwonend | 66,1 | |
|  | Nooit gehuwd | 20,3 | |
|  | Verweduwd | 7,4 | |
| **Hoogst behaalde opleidingsniveau*** | Basisschool | 6,2 | |
|  | Lbo/mavo | 24,4 | |
|  | Mbo/havo/vwo | 35,0 | |
| **Kwartiel gestandardiseerd huishoudinkomen**§ | 0-25% | 18,7 | |
| 26-50% | 23,7 | |
|  | 51-75% | 27,4 | |
| **Moeite met rondkomen*** | Ja, grote moeite | 4,7 | |
|  | Ja, enige moeite | 13,5 | |
|  | Nee, geen moeite, maar wel opletten op uitgaven | 35,2 | |
| **Beweging*** | Onvoldoende | 34,7 | |
| **BMI*** | Normaal(18,5-25) | 49,4 | |
|  | Overgewicht(25-30) | 35,1 | |
|  | Obesitas(30>) | 13,8 | |
| **Alcohol consumptie*** | Nooit | 24,4 | |
|  | Matig | 75,6 | |
| **Roken*** | Nooit gerookt | 45,8 | |
|  | Ex-roker | 33,3 | |
| **Zelfregie*** | Onvoldoende (score <20) | 9,9 | |
| **Eenzaamheid*** | Matig of (zeer) ernstig (scores >2) | 42,8 | |
| **Chronische ziekte*** | Geen | 66,0 | |
| **Zelf-ervaren gezondheid*** | Zeer (goed) | 75,6 | |
| **Risico op angststoornis of depressie*** | Geen of laag | 93,5 | |

BMI: body mass index. §Register data *Zelf-gerapporteerde data (gezondheidsmonitor). ¹ De variabelen eenzaamheid en zelfregie zijn continue variabelen. De 11 stellingen voor eenzaamheid (zie tabel A2) worden beantwoord “ja”, “min of meer” of “nee” en resulteren in een score tussen de 0 en 11. Respondenten met een score van 0,1 of 2 worden beschouwd als niet eenzaam, respondenten met een score van 3 tot en met 8 zijn matig eenzaam, respondenten met een score van 9 of 10 zijn ernstig eenzaam en respondenten met een score van 11 zijn zeer ernstig eenzaam. De 7 stellingen voor zelfregie worden beantwoord op een 5-punts Likert schaal (helemaal mee eens [laagste score 1], mee eens, niet mee eens/oneens, niet mee eens of helemaal niet mee eens [hoogste score 5]). Dit leidt tot een score tussen de 7 en 35, met een score van 19 of lager wordt onvoldoende zelfregie ervaren. ² De variabele risico op een angststoornis of een depressie is afgeleid van de Kessler-10 vragenlijst. De 10 vragen (zie tabel A2) worden beantwoord middels de antwoordcategorieën op een 5-punts Likert schaal (altijd, meestal, soms, af en toe, en nooit). De K10 score varieert tussen 10 (geen risico) en maximaal 50 (hoog risico).

| Tabel A5. Percentages per GGD regio (n = 334.721) | | | | | | | | |  |  |  |
| --- | --- | --- | --- | --- | --- | --- | --- | --- | --- | --- | --- |
|  | **BMI** | | **Alcohol-consumptie** | **Roken** | | **Beweging** | **Eenzaam** | **Zelfregie** | **Zelf-ervaren gezondheid** | **Chronische ziekte** | **Risico op een angststoornis of depressie** |
| % | Over-gewicht | Obesitas | Overmatig | Ex-roker | Roker | On-voldoende | **Matig, (zeer) ernstig¹** | On-voldoende² | Gaat wel of (zeer) slecht | >=1 ziekte | Hoog |
| Zuid-Limburg | 35,4 | 16,3 | 7,4 | 33,7 | 22,3 | 40,6 | 46,6 | 11,4 | 28,0 | 37,1 | 7,1 |
| Zuid-Holland Zuid | 36,3 | 15,1 | 5,3 | 32,4 | 21,1 | 38,0 | 41,2 | 9,5 | 21,1 | 30,6 | 4,9 |
| Zeeland | 36,5 | 13,7 | 6,2 | 35,5 | 17,5 | 29,9 | 45,5 | 10,0 | 25,6 | 32,7 | 5,2 |
| Zaanstreek Waterland | 36,1 | 14,7 | 7,3 | 34,0 | 21,5 | 34,0 | 39,8 | 9,4 | 23,0 | 35,1 | 5,8 |
| West Brabant | 36,1 | 13,5 | 6,5 | 35,1 | 17,8 | 34,8 | 42,1 | 9,3 | 24,6 | 30,1 | 5,5 |
| Utrecht | 31,2 | 11,6 | 7,6 | 31,4 | 19,6 | 33,3 | 39,5 | 7,9 | 20,3 | 30,6 | 5,0 |
| Twente | 37,4 | 14,0 | 8,1 | 33,1 | 20,5 | 29,2 | 39,3 | 8,1 | 21,1 | 33,4 | 7,0 |
| Rotterdam | 35,4 | 15,6 | 6,3 | 29,7 | 24,0 | 39,7 | 45,6 | 10,6 | 26,0 | 35,0 | 7,7 |
| Noord Oost Gelderland | 37,7 | 13,8 | 6,7 | 36,3 | 18,5 | 31,0 | 36,7 | 8,5 | 20,5 | 35,5 | 5,3 |
| Limburg Noord | 37,1 | 13,7 | 6,5 | 37,5 | 18,6 | 33,7 | 43,6 | 8,9 | 24,1 | 34,4 | 4,8 |
| Kennemerland | 34,4 | 12,3 | 8,0 | 35,3 | 19,3 | 31,6 | 39,6 | 7,7 | 19,9 | 31,3 | 4,9 |
| IJselland | 35,5 | 12,5 | 7,2 | 35,5 | 20,1 | 31,3 | 37,8 | 8,2 | 20,1 | 33,9 | 5,3 |
| Hollands Noorden | 34,9 | 12,9 | 7,8 | 36,2 | 19,6 | 30,8 | 39,7 | 8,3 | 21,7 | 32,4 | 5,1 |
| Hollands Midden | 35,4 | 12,9 | 7,7 | 33,3 | 18,5 | 31,5 | 40,1 | 9,4 | 20,0 | 34,8 | 6,0 |
| Hart van Brabant | 35,4 | 13,6 | 7,7 | 34,8 | 19,0 | 33,0 | 40,0 | 8,9 | 23,4 | 31,1 | 5,6 |
| Haaglanden | 33,9 | 13,7 | 6,7 | 28,2 | 21,3 | 34,5 | 46,6 | 10,9 | 24,7 | 36,2 | 8,9 |
| Groningen | 34,9 | 13,9 | 8,0 | 32,1 | 24,4 | 33,8 | 41,5 | 8,0 | 21,9 | 35,5 | 4,8 |
| Gooi en Vechtstreek | 32,9 | 9,9 | 8,6 | 37,5 | 17,8 | 37,5 | 37,5 | 7,9 | 21,1 | 31,6 | 5,2 |
| Gelderland Zuid | 34,3 | 12,8 | 7,0 | 31,3 | 21,6 | 35,0 | 40,7 | 8,5 | 21,0 | 31,9 | 6,1 |
| Gelderland Midden | 32,7 | 13,8 | 5,9 | 33,4 | 19,4 | 33,2 | 41,1 | 8,9 | 21,2 | 34,7 | 6,9 |
| Friesland | 36,2 | 13,2 | 7,2 | 36,2 | 21,4 | 32,6 | 41,9 | 8,8 | 20,4 | 33,3 | 4,9 |
| Flevoland | 37,7 | 14,5 | 4,4 | 32,0 | 17,5 | 40,8 | 42,5 | 9,6 | 22,8 | 34,6 | 7,0 |
| Drenthe | 37,0 | 15,1 | 8,2 | 35,3 | 22,9 | 32,5 | 40,1 | 8,2 | 21,2 | 33,2 | 4,8 |
| Brabant Zuidoost | 35,0 | 12,0 | 7,7 | 34,5 | 18,1 | 31,4 | 42,0 | 9,9 | 24,6 | 30,9 | 6,1 |
| Amsterdam | 28,6 | 11,6 | 9,9 | 30,7 | 25,8 | 31,5 | 44,5 | 8,7 | 22,1 | 30,8 | 6,8 |

BMI: body mass index. Resultaten op basis van gewogen data.¹Continue variabele, betreft percentage respondenten met een score van 3 of hoger (van de 11) op de De Jong-Gierveld schaal. Deze respondenten ervaren enige vorm (matig, ernstig of zeer ernstig) van eenzaamheid. ²Continue variabele, betreft percentage respondenten met een score van 19 of lager (op een schaal van 7-35) voor zelfregie, deze respondenten ervaren onvoldoende regie over eigen leven.

| Tabel A6. Prevalentie ratio’s’ GGD-regio’s voor zelf ervaren gezondheid (zeer) slecht of gaat wel voor t.o.v. Zuid-Limburg. | | | | | | |
| --- | --- | --- | --- | --- | --- | --- |
| PR (95%CI) | Model 1 | Model 2 | Model 3a | Model 3b | Model 3c | Model 4 |
| Zuid-Limburg | 1,00 (ref) | 1,00 (ref) | 1,00 (ref) | 1,00 (ref) | 1,00 (ref) | 1,00 (ref) |
| Zuid-Holland-Zuid | **0,75 (0,70-0,80)** | **0,80 (0,75-0,85)** | **0,81 (0,76-0,86)** | **0,83 (0,78-0,88)** | **0,81 (0,77-0,86)** | **0,83 (0,79-0,88)** |
| Zeeland | **0,91 (0,85-0,96)** | **0,94 (0,89-1,00)** | **1,02 (0,96-1,07)** | **0,94 (0,89-0,99)** | **0,94 (0,89-1,00)** | 1,00(0,95-1,05) |
| Zaanstreek-Waterland | **0,82 (0,78-0,86)** | **0,85 (0,81-0,89)** | **0,89 (0,85-0,93)** | **0,90 (0,86-0,95)** | **0,89 (0,85-0,94)** | **0,94 (0,90-0,98)** |
| West-Brabant | **0,88 (0,84-0,93)** | **0,95 (0,90-1,00)** | **1,00 (0,95-1,05)** | **0,96 (0,91-1,01)** | **0,96 (0,91-1,00)** | 1,00(0,95-1,05) |
| Utrecht | **0,73 (0,69-0,76)** | **0,85 (0,82-0,89)** | **0,90 (0,86-0,93)** | **0,89 (0,86-0,93)** | **0,89 (0,86-0,93)** | **0,94 (0,90-0,98)** |
| Twente | **0,75 (0,71-0,80)** | **0,81 (0,77-0,86)** | **0,85 (0,81-0,90)** | **0,86 (0,81-0,90)** | **0,84 (0,80-0,89)** | **0,88 (0,83-0,93)** |
| Rotterdam | **0,93 (0,89-0,97)** | **0,85 (0,82-0,88)** | **0,87 (0,83-0,90)** | **0,89 (0,86-0,93)** | **0,90 (0,87-0,93)** | **0,93 (0,89-0,96)** |
| Noord-Oost-Gelderland | **0,73 (0,69-0,77)** | **0,83 (0,79-0,87)** | **0,87 (0,83-0,92)** | **0,87 (0,83-0,92)** | **0,84 (0,81-0,88)** | **0,89 (0,85-0,93)** |
| Limburg-Noord | **0,86 (0,82-0,90)** | **0,90 (0,86-0,94)** | **0,95 (0,91-0,99)** | **0,91 (0,87-0,96)** | **0,94 (0,90-0,98)** | 0,97 (0,93-1,01) |
| Kennermeland | **0,72 (0,68-0,76)** | **0,78 (0,74-0,83)** | **0,83 (0,79-0,88)** | **0,82 (0,78-0,87)** | **0,85 (0,81-0,89)** | **0,90 (0,85-0,94)** |
| Ijselland | **0,72 (0,67-0,77)** | **0,84 (0,78-0,90)** | **0,89 (0,83-0,95)** | **0,88 (0,83-0,95)** | **0,86 (0,80-0,91)** | **0,91 (0,85-0,97)** |
| Hollands Noorden | **0,78 (0,74-0,82)** | **0,84 (0,80-0,89)** | **0,90 (0,86-0,95)** | **0,88 (0,84-0,93)** | **0,91 (0,86-0,95)** | **0,95 (0,91-0,99)** |
| Hollands Midden | **0,72 (0,68-0,75)** | **0,82 (0,78-0,86)** | **0,87 (0,83-0,91)** | **0,85 (0,82-0,89)** | **0,81 (0,77-0,84)** | **0,86 (0,82-0,90)** |
| Hart voor Brabant | **0,88 (0,84-0,93)** | **0,93 (0,89-0,97)** | **0,98 (0,94-1,02)** | **0,95 (0,91-0,99)** | **0,96 (0,92-1,00)** | **0,92 (0,88-0,96)** |
| Haaglanden | **0,84 (0,80-0,88)** | **0,86 (0,82-0,90)** | **0,89 (0,85-0,93)** | **0,89 (0,85-0,93)** | **0,89 (0,85-0,93)** | 1,00(0,96-1,05) |
| Groningen | **0,79 (0,74-0,83)** | **0,85 (0,81-0,90)** | **0,88 (0,84-0,93)** | **0,90 (0,86-0,95)** | **0,93 (0,89-0,98)** | 0,96(0,92-1.01) |
| Gooi en Vechtstreek | **0,76 (0,70-0,81)** | **0,82 (0,77-0,88)** | **0,88 (0,82-0,94)** | **0,88 (0,83-0,94)** | **0,87 (0,82-0,93)** | **0,94 (0,88-0,99)** |
| Gelderland-Zuid | **0,75 (0,71-0,79)** | **0,85 (0,80-0,89)** | **0,88 (0,84-0,92)** | **0,88 (0,84-0,92)** | **0,87 (0,83-0,91)** | **0,90 (0,86-0,95)** |
| Gelderland-Midden | **0,76 (0,71-0,81)** | **0,84 (0,79-0,90)** | **0,88 (0,83-0,94)** | **0,86 (0,81-0,92)** | **0,85 (0,80-0,90)** | **0,89 (0,84-0,94)** |
| Friesland | **0,73 (0,69-0,77)** | **0,78 (0,74-0,82)** | **0,82 (0,78-0,87)** | **0,82 (0,78-0,86)** | **0,83 (0,79-0,87)** | **0,86 (0,82-0,91)** |
| Flevoland | **0,81 (0,71-0,92)** | **0,88 (0,78-0,99)** | **0,91 (0,81-1,02)** | **0,91 (0,82-1,02)** | **0,94 (0,84-1,05)** | 0,96 (0,87-1,07) |
| Drenthe | **0,76 (0,70-0,82)** | **0,80 (0,74-0,86)** | **0,82 (0,76-0,88)** | **0,84 (0,78-0,90)** | **0,86 (0,80-0,92)** | **0,88 (0,82-0,94)** |
| Brabant-Zuidoost | **0,88 (0,84-0,92)** | **0,98 (0,93-1,02)** | **1,05 (1,00-1,09)** | **1,00 (0,95-1,04)** | **0,97 (0,93-1,02)** | 1,04 (0,99-1,08) |
| Amsterdam | **0,79 (0,74-0,84)** | **0,77 (0,73-0,82)** | **0,81 (0,77-0,86)** | **0,82 (0,78-0,87)** | **0,85 (0,80-0,89)** | **0,88 (0,84-0,93)** |

PR: prevalentie ratio. CI: confidence interval. PR’s dikgedrukt zijn significant p<0,05. Model 1: regio. Model 2: regio, demografie, en SES. Model 3a: regio, demografie, SES, en leefstijl. Model 3b: regio, demografie, SES, en eenzaamheid. Model 3c: regio, demografie, SES, en zelfregie. Model 4: regio, demografie, SES, leefstijl, eenzaamheid, en zelfregie. Resultaten van robuuste Poisson regressies (n = 334.721), op basis van gewogen data.

| Tabel A7. Prevalentie ratio’s GGD-regio’s voor het hebben van minimaal één chronische ziekte t.o.v. Zuid-Limburg. | | | | | | |
| --- | --- | --- | --- | --- | --- | --- |
| PR (95% CI) | Model 1 | Model 2 | Model 3a | Model 3b | Model 3c | Model 4 |
| Zuid-Limburg | 1,00 (ref) | 1,00 (ref) | 1,00 (ref) | 1,00 (ref) | 1,00 (ref) | 1,00 (ref) |
| Zuid-Holland-Zuid | **0,83 (0,78-0,87)** | **0,86 (0,82-0,91)** | **0,87 (0,82-0,91)** | **0,88 (0,83-0,92)** | **0,87 (0,83-0,91)** | **0,88 (0,84-0,92)** |
| Zeeland | **0,87 (0,83-0,91)** | **0,87 (0,83-0,91)** | **0,90 (0,86-0,94)** | **0,87 (0,83-0,91)** | **0,87 (0,83-0,91)** | **0,89 (0,85-0,93)** |
| Zaanstreek-Waterland | **0,93 (0,90-0,97)** | **0,96 (0,93-1,00)** | **0,98 (0,94-1,02)** | **0,99 (0,95-1,03)** | **0,99 (0,95-1,02)** | 1,01 (0,97-1,05) |
| West-Brabant | **0,81 (0,77-0,84)** | **0,84 (0,80-0,87)** | **0,85 (0,82-0,89)** | **0,84 (0,81-0,88)** | **0,84 (0,80-0,87)** | **0,85 (0,82-0,89)** |
| Utrecht | **0,82 (0,79-0,85)** | **0,91 (0,88-0,94)** | **0,94 (0,91-0,97)** | **0,93 (0,90-0,96)** | **0,93 (0,91-0,96)** | **0,95 (0,93-0,98)** |
| Twente | **0,89 (0,85-0,94)** | **0,94 (0,90-0,99)** | **0,97 (0,93-1,01)** | **0,97 (0,93-1,01)** | **0,96 (0,92-1,00)** | 0,98 (0,94-1,02) |
| Rotterdam | **0,94 (0,91-0,97)** | **0,94 (0,91-0,98)** | **0,95 (0,92-0,98)** | **0,96 (0,93-1,00)** | **0,97 (0,94-1,00)** | 0,98 (0,95-1,01) |
| Noord-Oost-Gelderland | **0,95 (0,92-0,99)** | **1,00 (0,97-1,04)** | **1,02 (0,99-1,06)** | **1,03 (0,99-1,07)** | **1,01 (0,97-1,05)** | 1,03 (0,99-1,07) |
| Limburg-Noord | **0,93 (0,89-0,96)** | **0,94 (0,91-0,98)** | **0,96 (0,93-1,00)** | **0,95 (0,92-0,98)** | **0,96 (0,93-0,99)** | 0,97 (0,94-1,01) |
| Kennermeland | **0,84 (0,80-0,88)** | **0,88 (0,84-0,92)** | **0,90 (0,87-0,94)** | **0,90 (0,87-0,94)** | **0,92 (0,88-0,95)** | **0,94 (0,90-0,97)** |
| Ijselland | **0,91 (0,87-0,96)** | **1,00 (0,96-1,05)** | **1,03 (0,98-1,08)** | **1,03 (0,98-1,08)** | **1,01 (0,96-1,05)** | 1,03 (0,98-1,08) |
| Hollands Noorden | **0,87 (0,83-0,91)** | **0,90 (0,87-0,94)** | **0,93 (0,90-0,97)** | **0,92 (0,89-0,96)** | **0,94 (0,90-0,98)** | **0,96 (0,92-0,99)** |
| Hollands Midden | **0,93 (0,90-0,97)** | **1,01 (0,97-1,04)** | **1,03 (1,00-1,07)** | **1,03 (0,99-1,06)** | **0,99 (0,96-1,02)** | 1,02 (0,98-1,05) |
| Hart voor Brabant | **0,84 (0,80-0,87)** | **0,88 (0,85-0,91)** | **0,90 (0,87-0,94)** | **0,89 (0,86-0,93)** | **0,89 (0,86-0,93)** | **0,91 (0,88-0,94)** |
| Haaglanden | 0,97 (0,93-1,01) | **1,00 (0,97-1,04)** | **1,02 (0,99-1,06)** | **1,02 (0,98-1,06)** | **1,02 (0,99-1,06)** | **1,04 (1,00-1,08)** |
| Groningen | **0,95 (0,91-0,99)** | **1,01 (0,97-1,05)** | **1,03 (0,99-1,07)** | **1,04 (0,99-1,08)** | **1,05 (1,01-1,09)** | **1,06 (1,02-1,11)** |
| Gooi en Vechtstreek | **0,85 (0,81-0,90)** | **0,87 (0,83-0,92)** | **0,90 (0,86-0,95)** | **0,90 (0,85-0,95)** | **0,90 (0,86-0,95)** | **0,93 (0,89-0,98)** |
| Gelderland-Zuid | **0,86 (0,82-0,90)** | **0,93 (0,89-0,97)** | **0,94 (0,91-0,98)** | **0,94 (0,91-0,98)** | **0,93 (0,90-0,97)** | **0,95 (0,91-0,99)** |
| Gelderland-Midden | **0,93 (0,88-0,98)** | **0,99 (0,94-1,04)** | **1,01 (0,96-1,06)** | **1,00 (0,96-1,05)** | **0,99 (0,94-1,04)** | 1,01 (0,96-1,06) |
| Friesland | **0,89 (0,86-0,93)** | **0,91 (0,88-0,95)** | **0,93 (0,90-0,97)** | **0,93 (0,89-0,97)** | **0,94 (0,90-0,97)** | **0,95 (0,92-0,99)** |
| Flevoland | 0,93 (0,85-1,02) | **1,01 (0,92-1,10)** | **1,02 (0,94-1,11)** | **1,03 (0,94-1,12)** | **1,03 (0,95-1,13)** | 1,05 (0,96-1,14) |
| Drenthe | **0,90 (0,84-0,95)** | **0,91 (0,86-0,96)** | **0,92 (0,87-0,97)** | **0,93 (0,88-0,98)** | **0,94 (0,89-1,00)** | 0,95 (0,90-1,01) |
| Brabant-Zuidoost | **0,83 (0,80-0,87)** | **0,87 (0,84-0,91)** | **0,90 (0,87-0,94)** | **0,88 (0,85-0,92)** | **0,87 (0,84-0,91)** | **0,90 (0,86-0,93)** |
| Amsterdam | **0,83 (0,79-0,87)** | **0,88 (0,84-0,92)** | **0,90 (0,86-0,94)** | **0,90 (0,86-0,94)** | **0,92 (0,88-0,96)** | **0,93 (0,89-0,98)** |

PR: prevalentie ratio. CI: confidence interval. PR’s dikgedrukt zijn significant p<0,05. Model 1: regio. Model 2: regio, demografie, en SES. Model 3a: regio, demografie, SES, en leefstijl. Model 3b: regio, demografie, SES, en eenzaamheid. Model 3c: regio, demografie, SES, en zelfregie. Model 4: regio, demografie, SES, leefstijl, eenzaamheid, en zelfregie. Resultaten van robuuste Poisson regressies (n = 334.721), op basis van gewogen data.

| Tabel A8. Odds Ratios GGD-regio’s voor het hebben van een hoog risico op een angststoornis of depressie voor t.o.v. Zuid-Limburg. | | | | | | |
| --- | --- | --- | --- | --- | --- | --- |
| OR (95% CI) | Model 1 | Model 2 | Model 3a | Model 3b | Model 3c | Model 4 |
| Zuid-Limburg | 1,00 (ref) | 1,00 (ref) | 1,00 (ref) | 1,00 (ref) | 1,00 (ref) | 1,00 (ref) |
| Zuid-Holland-Zuid | **0,66 (0,54-0,79)** | **0,71 (0,58-0,86)** | **0,72 (0,59-0,88)** | **0,77 (0,63-0,95)** | **0,69 (0,54-0,88)** | **0,76 (0,60-0,96)** |
| Zeeland | **0,70 (0,58-0,84)** | **0,83 (0,68-1,00)** | **0,91 (0,75-1,11)** | **0,81 (0,66-0,99)** | **0,77 (0,62-0,96)** | **0,80 (0,64-0,99)** |
| Zaanstreek-Waterland | **0,82 (0,72-0,94)** | **0,86 (0,75-1,00)** | **0,92 (0,80-1,06)** | **1,06 (0,91-1,23)** | **0,97 (0,82-1,15)** | 1,09 (0,92-1,30) |
| West-Brabant | **0,75 (0,65-0,88)** | **0,89 (0,76-1,04)** | **0,95 (0,81-1,12)** | **0,92 (0,78-1,08)** | **0,92 (0,76-1,12)** | 0,96 (0,79-1,16) |
| Utrecht | **0,69 (0,61-0,77)** | **0,77 (0,69-0,87)** | **0,82 (0,73-0,93)** | **0,89 (0,79-1,01)** | **0,87 (0,75-1,00)** | 0,94 (0,81-1,09) |
| Twente | 0,96 (0,81-1,14) | **1,08 (0,91-1,28)** | **1,18 (0,98-1,40)** | **1,30 (1,08-1,57)** | **1,31 (1,07-1,60)** | **1,49 (1,20-1,84)** |
| Rotterdam | 1,07 (0,96-1,19) | **0,78 (0,69-0,88)** | **0,80 (0,71-0,90)** | **0,91 (0,80-1,04)** | **0,92 (0,80-1,06)** | 0,99 (0,86-1,15) |
| Noord-Oost-Gelderland | **0,71 (0,62-0,81)** | **0,94 (0,82-1,08)** | **1,02 (0,88-1,17)** | **1,04 (0,90-1,21)** | **0,97 (0,83-1,14)** | 1,05 (0,89-1,25) |
| Limburg-Noord | **0,67 (0,59-0,76)** | **0,77 (0,67-0,88)** | **0,81 (0,71-0,93)** | **0,78 (0,67-0,90)** | **0,82 (0,70-0,97)** | **0,84 (0,71-0,99)** |
| Kennermeland | **0,68 (0,58-0,79)** | **0,76 (0,65-0,89)** | **0,82 (0,70-0,96)** | **0,87 (0,74-1,03)** | **0,90 (0,75-1,08)** | 1,01 (0,84-1,22) |
| Ijselland | **0,70 (0,58-0,84)** | **0,86 (0,71-1,05)** | **0,94 (0,77-1,14)** | **1,02 (0,83-1,26)** | **0,86 (0,69-1,08)** | 0,99 (0,79-1,25) |
| Hollands Noorden | **0,71 (0,61-0,82)** | **0,78 (0,67-0,91)** | **0,85 (0,73-0,99)** | **0,90 (0,77-1,06)** | **0,86 (0,72-1,03)** | 0,95 (0,79-1,14) |
| Hollands Midden | **0,82 (0,72-0,92)** | **1,00 (0,88-1,14)** | **1,09 (0,95-1,24)** | **1,15 (1,00-1,32)** | **0,96 (0,82-1,13)** | 1,11 (0,94-1,30) |
| Hart voor Brabant | **0,76 (0,67-0,86)** | **0,91 (0,80-1,04)** | **0,98 (0,86-1,12)** | **0,99 (0,86-1,15)** | **0,99 (0,84-1,17)** | 1,05 (0,89-1,24) |
| Haaglanden | **1,27 (1,12-1,44)** | **1,05 (0,92-1,19)** | **1,10 (0,96-1,26)** | **1,17 (1,02-1,35)** | **1,13 (0,96-1,34)** | **1,22 (1,03-1,44)** |
| Groningen | **0,66 (0,57-0,78)** | **0,65 (0,55-0,77)** | **0,69 (0,59-0,82)** | **0,80 (0,67-0,95)** | **0,76 (0,62-0,92)** | 0,84 (0,69-1,03) |
| Gooi en Vechtstreek | **0,71 (0,58-0,87)** | **0,82 (0,66-1,02)** | **0,88 (0,71-1,09)** | **0,99 (0,79-1,25)** | **0,88 (0,69-1,13)** | 1,01 (0,78-1,29) |
| Gelderland-Zuid | **0,86 (0,75-0,98)** | **0,98 (0,85-1,13)** | **1,04 (0,90-1,20)** | **1,13 (0,97-1,32)** | **1,09 (0,92-1,29)** | 1,19 (0,99-1,42) |
| Gelderland-Midden | 0,95 (0,78-1,14) | **1,10 (0,91-1,32)** | **1,16 (0,97-1,40)** | **1,18 (0,97-1,43)** | **1,10 (0,89-1,35)** | 1,19 (0,97-1,46) |
| Friesland | **0,66 (0,57-0,77)** | **0,75 (0,64-0,88)** | **0,80 (0,68-0,94)** | **0,86 (0,73-1,02)** | **0,86 (0,72-1,03)** | 0,95 (0,79-1,14) |
| Flevoland | 1,01 (0,74-1,37) | **0,98 (0,71-1,35)** | **1,03 (0,74-1,43)** | **1,12 (0,80-1,55)** | **1,18 (0,84-1,67)** | 1,27 (0,90-1,79) |
| Drenthe | **0,65 (0,52-0,80)** | **0,70 (0,56-0,88)** | **0,71 (0,57-0,90)** | **0,79 (0,62-1,02)** | **0,80 (0,60-1,07)** | 0,84 (0,63-1,13) |
| Brabant-Zuidoost | **0,83 (0,73-0,94)** | **1,01 (0,88-1,17)** | **1,12 (0,97-1,29)** | **1,08 (0,93-1,25)** | **0,99 (0,84-1,18)** | 1,04 (0,87-1,24) |
| Amsterdam | 0,96 (0,84-1,11) | **0,73 (0,62-0,85)** | **0,77 (0,66-0,90)** | **0,90 (0,76-1,06)** | **0,93 (0,78-1,11)** | 1,03 (0,86-1,23) |

OR: Odds Ratio. CI: confidence interval. OR’s dikgedrukt zijn significant p<0,05. Model 1: regio. Model 2: regio, demografie, en SES. Model 3a: regio, demografie, SES, en leefstijl. Model 3b: regio, demografie, SES, en eenzaamheid. Model 3c: regio, demografie, SES, en zelfregie. Model 4: regio, demografie, SES, leefstijl, eenzaamheid en zelfregie. Resultaten van logistische regressies (n = 334.721), op basis van gewogen data.
